# Supplementary material for: Nucleoside-modified mRNA immunization elicits influenza virus hemagglutinin stalk-specific antibodies
Source: PubMed Central journal article supplement (PMC6105651; doi:10.1038/s41467-018-05482-0), 2018-08-22
Supplement: 41467_2018_5482_MOESM1_ESM.pdf [file 41467_2018_5482_MOESM1_ESM.pdf]

Nucleoside-modified mRNA immunization elicits influenza virus hemagglutinin stalk-specific antibodies

Pardi et al.

Supplementary figures

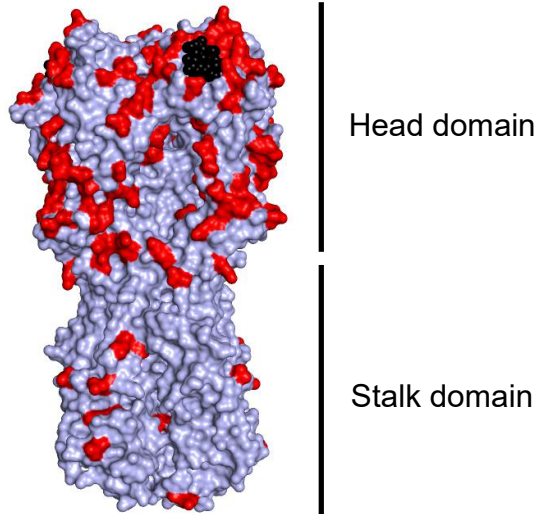

**Supplementary Figure 1** Hemagglutinin structure and sequence conservation between the A/California/07/2009 and Puerto Rico/8/1934 influenza viruses. Shown is a structure of the hemagglutinin glycoprotein with the globular head and stalk domains denoted. Amino acid differences between A/California/07/2009 and Puerto Rico/8/1934 are highlighted in red on the A/California/07/2009 crystal structure (PDB ID 3UBN), while the cellular receptor sialic acid is shown in black.

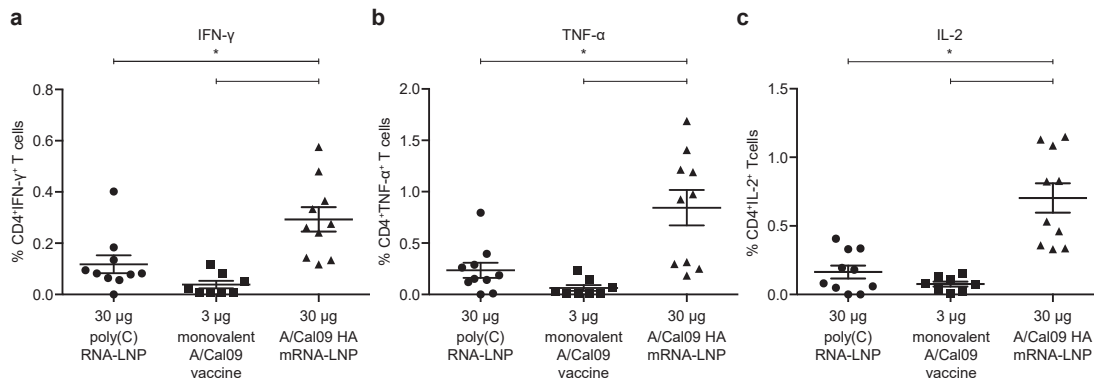

**Supplementary Figure 2** Nucleoside-modified A/California/07/2009 HA mRNA-LNP immunization elicits antigen-specific CD4<sup>+</sup> T cell responses. Mice were immunized i.d. with a single dose of 30  $\mu$ g of A/California/07/2009 HA mRNA-LNPs or 30  $\mu$ g of poly(C) RNA-LNPs or i.m. with 3  $\mu$ g of monovalent A/California/07/2009 virus vaccine. Splenocytes were stimulated with HA peptides 12 days after immunization and cytokine production by CD4<sup>+</sup> T cells was assessed by flow cytometry. Percentage of CD4<sup>+</sup> T cells producing (a) IFN- $\gamma$ , (b) TNF- $\alpha$  and (c) IL-2 is shown.  $n=8-10$  mice and each symbol represents one animal. Experiments were repeated to achieve statistical significance. Horizontal lines show the mean. Error bars are SEM. Statistical analysis: one-way ANOVA with Bonferroni correction, \* $p<0.05$

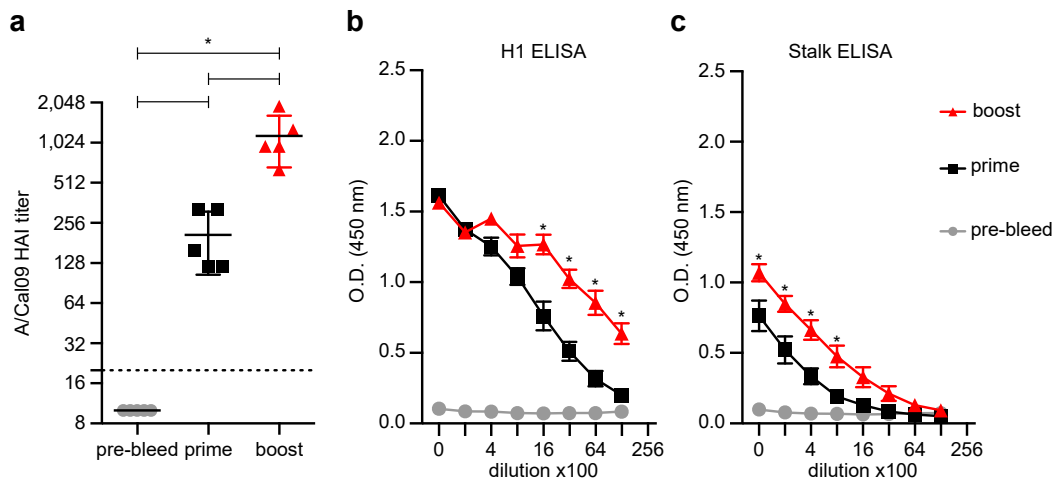

**Supplementary Figure 3** Nucleoside-modified A/California/07/2009 HA mRNA-LNP immunization elicits HA stalk-reactive antibodies in rabbits. Animals were immunized i.d. two times with 50  $\mu$ g of A/California/07/2009 HA mRNA-LNPs at week 0 and 6. Serum was collected at weeks 0 (pre-bleed), 6 and 18 and (a) HAI titers against the A/California/07/2009 virus, binding to full-length H1 HA (b) and cH6/1 HA (c) were determined.  $n=5$  rabbits and on (a) each symbol represents one animal. (a) Horizontal lines show the mean; dotted line indicates the limit of detection. (a-c) Error bars are SEM. Statistical analysis: (a) one-way ANOVA with Bonferroni correction,  $*p<0.05$ ; (b,c) two-way ANOVA with Bonferroni correction, comparing post prime samples to post boost samples for each serum dilution  $*p<0.05$ .

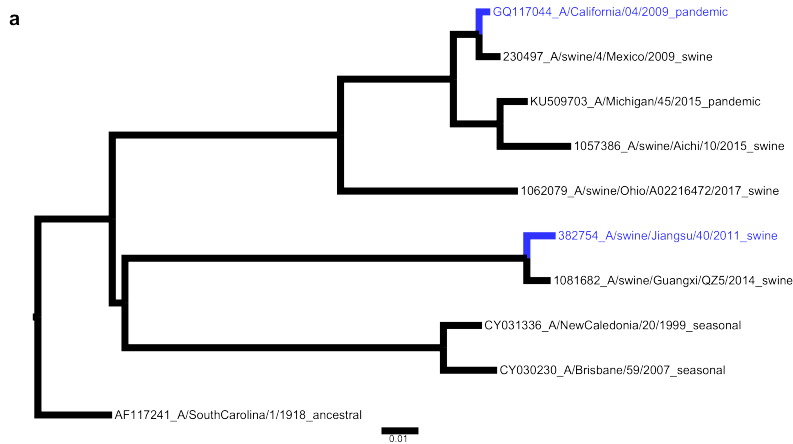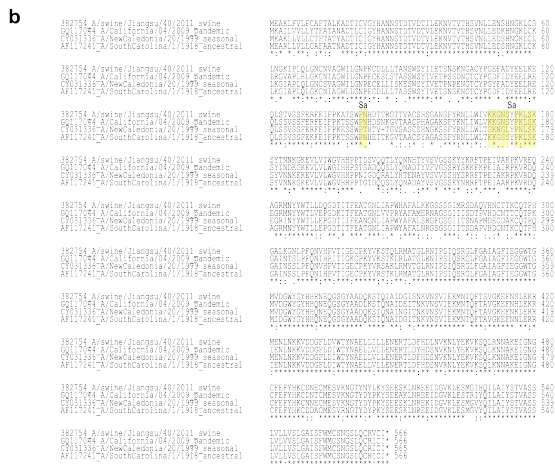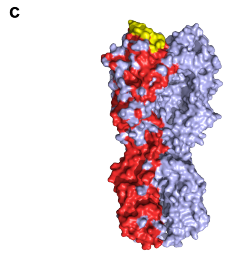

**Supplementary Figure 4** Illustration of shared antigenic residues of pH1N1 and asH1N1. **(a)** Phylogenetic tree based on the amino acid sequence similarity between the listed strains. A/California/04/2009 (pH1N1) and A/swine/Jiangsu/40/2011 (asH1N1) are highlighted in blue. The scale bar represents 1% divergence in amino acid sequence. **(b)** Multiple sequence alignment of the ancestral H1N1 strain (A/South Carolina/1/1918), pH1N1, and asH1N1. The Sa head antigenic site is highlighted in yellow to illustrate the 100% conservation between pH1N1 and asH1N1 at this site. **(c)** Three dimensional structure of the A/California/04/2009 (PDB ID 3LZG) HA protein with residues that are shared (100% conserved) between pH1N1 and asH1N1 shown on a single monomer in red. The Sa head antigenic site in yellow to show its position on the HA.

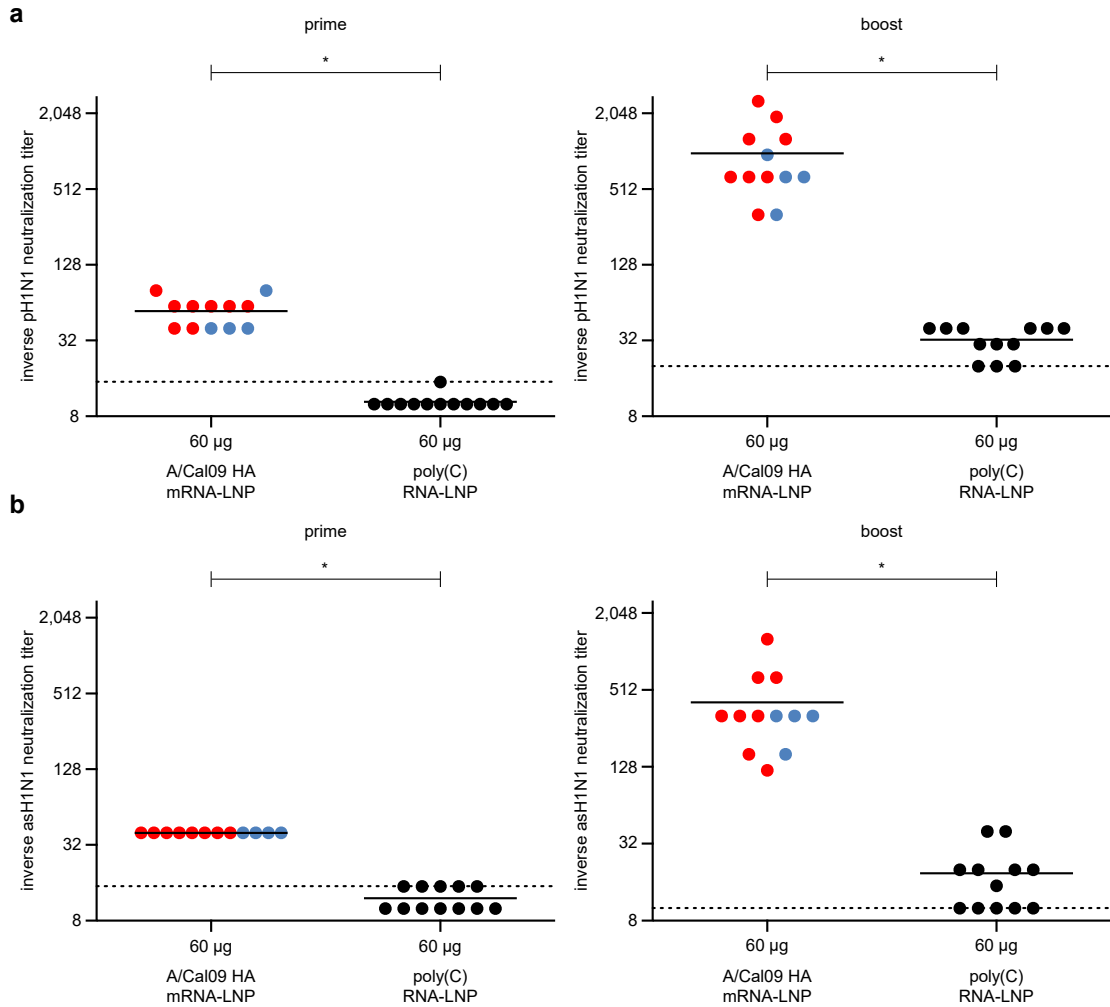

**Supplementary Figure 5** Nucleoside-modified A/California/07/2009 HA mRNA-LNP immunization induces cross-reactive neutralizing antibodies in ferrets. Animals were immunized i.m. two times with 60  $\mu$ g of A/California/07/2009 HA mRNA-LNPs or poly(C) RNA-LNPs at week 0 and 4. Serum was collected at weeks 0 (pre-vaccination), 4 and 13, and microneutralization titers against (a) pH1N1 and (b) asH1N1 influenza viruses were determined. Values are expressed as inverse microneutralization titers. Animals with no measurable A/California/07/2009 HAI activity after the first immunization are marked with blue dots.  $n=12$  ferrets and each symbol represents one animal. Horizontal lines show the mean; dotted line indicates the titer of the pre-vaccination serum pool. Statistical analysis: unpaired  $t$ -test comparing A/California/07/2009 HA mRNA-LNP-immunized animals to poly(C) RNA-LNP-immunized animals. \* $p<0.05$
